# Supplementary material
Source: MDPI journal article supplement (https://www.mdpi.com/2073-4344/12/11/1455)
Supplement: s1 [file s1]

# **One Step Synthesis of Oxygen Defective Bi@Ba<sub>2</sub>TiO<sub>4</sub>/BaBi<sub>4</sub>Ti<sub>4</sub>O<sub>15</sub> Microsheet with Efficient Photocatalytic Activity for NO Removal**

Ting Gao<sup>1</sup>, Ke Zhang<sup>1\*</sup>, Qiuhui Zhu<sup>1</sup>, Qingyun Tian<sup>1</sup>, Hui Wang<sup>1</sup>, Wei Zhang<sup>1</sup>, Jiangyushan Liang<sup>1</sup>, Jingqi Lin<sup>1</sup>, Ahmed A Allam<sup>2</sup>, Jamaan S Ajarem<sup>3</sup>, Peter K. J. Robertson<sup>4</sup>, Chuanyi Wang<sup>1\*</sup>

<sup>1</sup>*School of Environmental Science and Engineering, Shaanxi University of Science and Technology, Xi'an 710021, China*

<sup>2</sup>*Zoology Department, Faculty of Science, Beni-Suef University, Beni-Suef, Egypt*

<sup>3</sup>*Zoology Department, College of Science, King Saud University, Riyadh, Saudi Arabia*

<sup>4</sup>*School of Chemistry and Chemical Engineering, Queen's University Belfast, Stranmillis Road, Belfast BT9 5AG, United Kingdom*

\* Corresponding author.

E-mail addresses: wangchuanyi@sust.edu.cn (C. Wang)

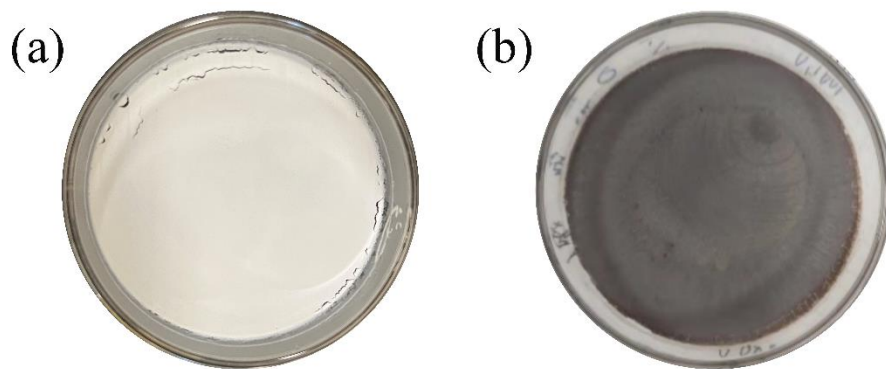

**Figure S1.** The optical images of (a)BT/BBT and (b)BT/BBT-0.1 uniform films.

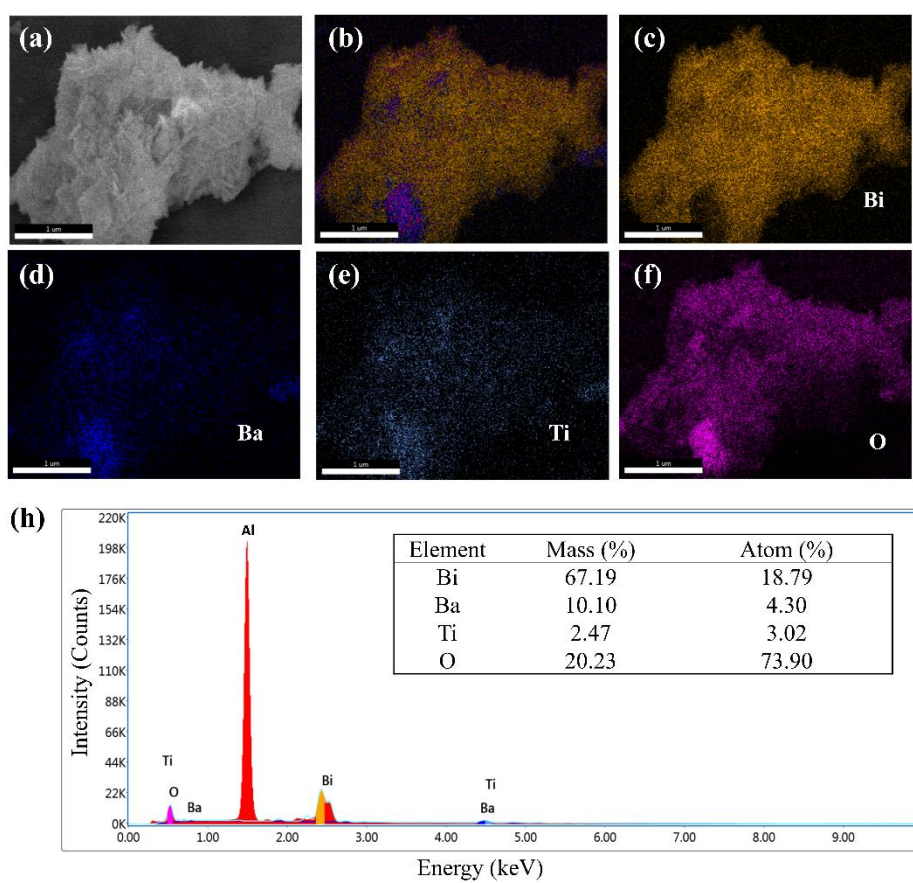

**Figure S2.** Morphology of BT/BBT-0.1 composite: (a) SEM images, (b) Element Overlay images, elemental mapping of (c) Bi element, (d) Ba element, (e) Ti element, and (f) O element, and (h) EDX images.

The Al element is detected on the surface of BT/BBT-0.1, which is because the sample is placed on aluminum foil sheets for test.
